# Supplementary material
Source: PubMed Central journal article supplement (PMC6454573)
Supplement: NIHMS932579-supplement-Visual_Abstract.pdf [file NIHMS932579-supplement-Visual_Abstract.pdf]

## No Stroke

Retrograde  
Neuronal  
Tracing

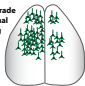

## Rehab

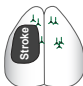

## Rehab + Vagus Nerve Stimulation

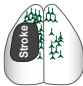

**New synaptic  
connections from  
cortex to trained  
forelimb**

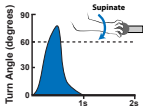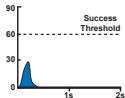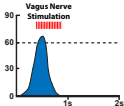

**Long lasting  
improvement on  
trained task**

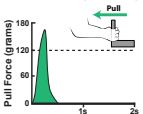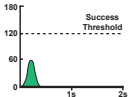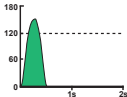

**Generalization of  
recovery to a similar,  
untrained task**

Arm and hand function is commonly impaired after stroke. Here we show that brief bursts of vagus nerve stimulation (VNS) delivered during motor rehabilitation triples the number of synaptic connections from motor cortex to muscles of the trained forelimb compared to rehabilitation alone. VNS paired with rehabilitation doubled recovery of forelimb rotation function, and the benefits persisted for months following cessation of VNS. Moreover, VNS-dependent recovery generalized to a similar, untrained task emphasizing forelimb strength.
